# Supplementary material for: Functional importance of NUDT9H domain and N-terminal ADPR-binding pocket in two species variants of vertebrate TRPM2 channels
Source: PubMed Central journal article supplement (PMC6914804; doi:10.1038/s41598-019-55232-5), 2019-12-16

## **SUPPLEMENTARY INFORMATION**

**ARTICLE TITLE:** Functional importance of NUDT9H domain and N-terminal ADPR-binding pocket in two species variants of vertebrate TRPM2 channels

**AUTHORS:** Frank J. P. Kühn\*, Wiebke Ehrlich, Daniel Barth, Cornelia Kühn & Andreas Lückhoff

\*Corresponding author: PD Dr. Frank Kühn, Institute of Physiology, RWTH Aachen. Email: [fkuehn@ukaachen.de](mailto:fkuehn@ukaachen.de). Telephone +49 (0) 241 8088803

**AUTHOR AFFILIATION:** Institute of Physiology, Medical Faculty, RWTH Aachen, D52057 Aachen, Germany.

## **SUPPLEMENTARY INFORMATION LEGEND**

**Figure S1. Identical Western-blot images as shown in Figs. 5c, 6c and 7b of the manuscript but developed with a different exposure time.**

ref. to Fig. 5c

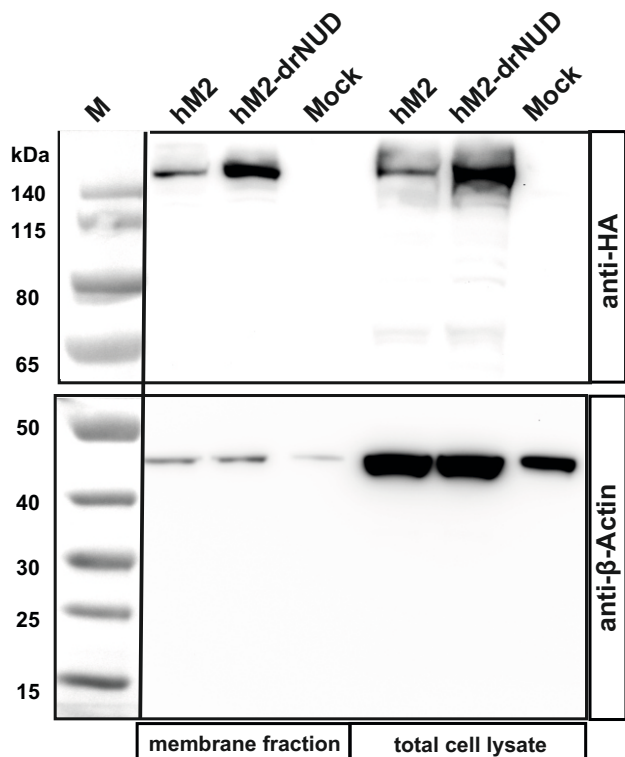

ref. to Fig. 6c

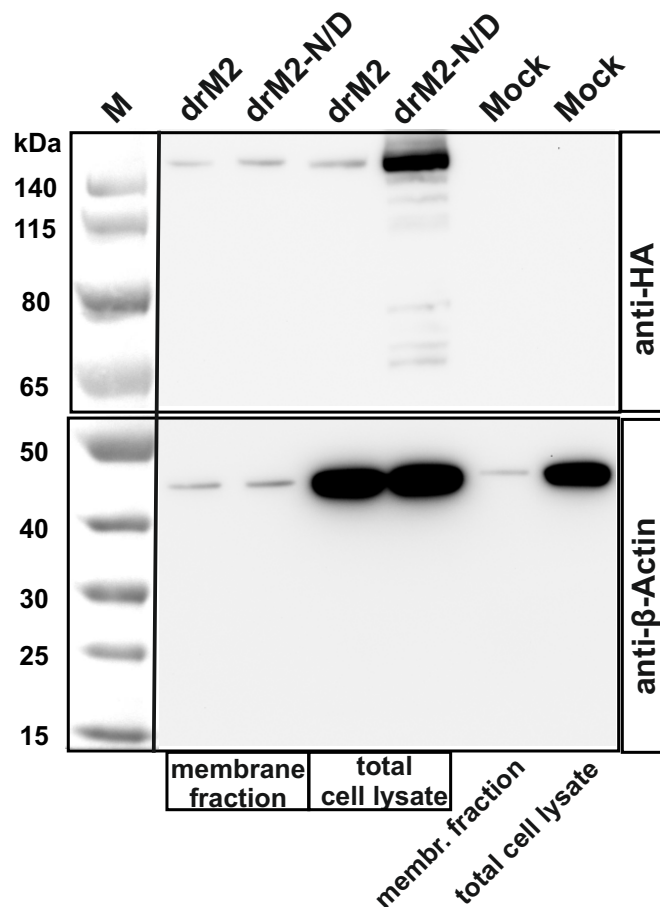

ref. to Fig. 7b

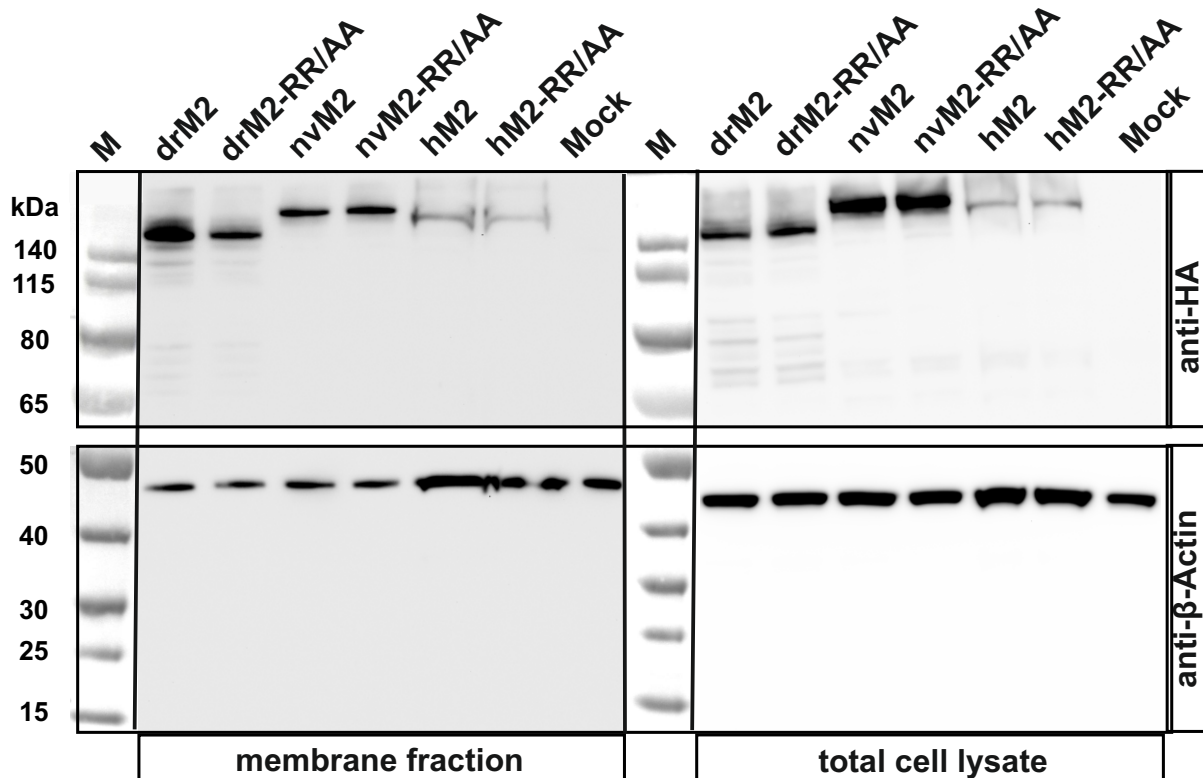

Supplement: 41598_2019_55232_MOESM1_ESM.pdf [file 41598_2019_55232_MOESM1_ESM.pdf]
